# Supplementary material for: Relationship among porcine lncRNA TCONS_00010987, miR-323, and leptin receptor based on dual luciferase reporter gene assays and expression patterns
Source: PubMed Central journal article supplement (PMC6946967; doi:10.5713/ajas.19.0065), 2019-07-01
Supplement: ajas-19-0065-suppl.pdf [file ajas-19-0065-suppl.pdf]

1 (a)

2 GGCATTTCCGGCCAGGGAGGACGCTCCAGATGAATGGGTAAGTACATCAAGAGCTTCGTGGAGCGC  
3 GTGCTGAAGAACGAGCAGTAATTCTAGGCGATCGCTCGAGAGGGAGACTGACTCTACTCGTGGGCC  
4 AATAATTTCTGTGAAGTTTATGGGAACGTATACGTTTGTACTAGATGATACGAACATATCTGTTGGTAC  
5 TAGATGATAGCTAAGGGTTTGCGCCAAGTAGAGCTTCTCAGGAGCCTCTATAATGGTGTCTAATAGG  
6 CTTTACGAATGTGAACTCATGTTGAAGAACAGCTGTTACCAAATAGCTGTTTCATGAAGGCGGGGA  
7 CAGCTTAGTTTTTCTCAGAATTATATTTCTCATTTTACTTTAACTAGCAGCTGTTATTTGGATGTCTAC  
8 ACCAATGAGATAATCAAGCAATTAGATTTCTGTATGCACCAGCAAACCAGTCAGTGTGTAGGAGATG  
9 GAAGAGGAAATAAATCACACACATGTATGGTGTGTATGTGTGTGTGTAGGCATAAACAGAGAAAAA  
10 CGTACTGGCACATACATAATAAGCACCTGCTAATTGTAGGTGTCATAATACTAAGATGTTATTTCTTAG  
11 GGTTATGACGTATTTGTCATATTGGACCTACCCAGGAGGTAGCTGAATATTTCTGCAGTGATCTGGGT  
12 GTCTTGCAGGGAGCACTGCTGGTCACAGGTCTGATATGAGGGAAGAAAAGGTTTTCACACAGAACA  
13 ATCAGGATGTAATAATGTGCTTTCCATTTTTAAAAAGCAGTCATCTGGGCAAGTGGCTTTTTGGTCTTT  
14 TGACCAACACTGTTCTCAACTTGCAAATTAATTCTTAGGCAGTTCTTACACAGCGGCCGCTGGCCGC  
15 AATAAAATATCTTTATTTTCATACATCTGTGTGTTGTTTATAAAGC

16

17 (b)

18 ACTGGATTGGTCATGCAGAGCTCCAGATGAATGGGTAAGTACATCAAGAGCTTCGTGGAGCGCGTGC  
19 TGAAGAACGAGCAGTAATTCTAGGCGATCGCTCGAGAGGGAGACTGACTCTACTCGTGGGCCAATA  
20 ATTTCTGTGAAGTTTATGGGAACGTATACGTTTGTACTAGATGATACGAACATATCTGTTGGTACTAGA  
21 TGATAGCTAAGGGTTTGCGCCAAGTAGAGCTTCTCAGGAGCCTCTATAATGGTGTCTAATAGGCTTT  
22 ACGAATGTGAACTCATGTTGAAGAACAGCTGTTACCAAATAGCTGTTTCATGAAGGCGGGGGACAG

23 CTTAGTTTTCTCAGAATTATATTTTCTCATTTTACTTTAACTAGCAGCTGTTATTTGGATGTCTACACC  
24 AATGAGATAATCAAGCAATTAGATTTCTGTATGCACCAGCAAACCAGTCAGTGTGTAGGAGATGGAA  
25 GAGGAAATAAATCACACACATGTATGGTGTGTATGTGTGTGTGTAGGCATAAACAGAGAAAAACGT  
26 ACTGGCACATACATAATAAGCACCTGCTAATTGTAGGTGTCATAATACTAAGATGTTATTTCTTAGGGT  
27 TATGACGTATTTGTCATATTGGACCTACCCAGGAGGTAGCTGAATATTTCTGCAGTGATCTGGGTGTCT  
28 TGCAGGGAGCACTGCTGGTCCACAGGTCTGATATGAGGGAAGAAAAGGTTTTCCACACAGAACAATCA  
29 GGATGTAAATTACACTTTCCATTTTTAAAAAGCAGTCATCTGGGCAAGTGGCTTTTTGGTCTTTTGAC  
30 CAACACTGTTCTCAACTTGCAAATTAATTCTTAGGCAGTTCTTACACAGCGGCCGCTGGCCGCAATA  
31 AAATATCTTTATTTTCATTACATCTGTGTGTTGGGTTTTTTTTGTGTGAGGATCTAAATGAGTCTTTTCGG  
32 ACCCTCGCGGGGGCCGCTTAAGCGGTGGTTAGGGTTTGT

33

34 Figure S1.

35

36

37

38

39

40

41

42

43

44

45 (a)

46 GGAGAGCTCCAGATGAATGGGTAAGTACATCAAGAGCTTCGTGGAGCGCGTGCTGAAGAACGAGC  
47 AGTAATTCTAGGCGATCGCTCGAGGTTTCATTCCAGAAACATCTCAGATTTATGATGGGATGAGTCAT  
48 ATTAAGGGTAATATGTTCTACATGGTGTTCATAGCAGAGAGAGAAAAAATTGAGTCAAATTTGAAA  
49 ATGACTTCAAAAGTTAAAGAGATCTGTTTGTCCACACTCAGTAATACAGAAAAAAATGATGAGAA  
50 AGCCTTCAAGAGCCTAGTAATGTAGACCTACTCTTCTAATGATTCTCTTAACCGGCTACAGTGGGAA  
51 GTTCTCGAATGCCTTGTGTCTAGCTAGAAACAAGCCCAACAATACTAGCGTTTTGAGCATTAAATCTC  
52 ATGTAGAAAGAGCTAATCCATCTGAATTACACATACATCTGAAAGAAGACTTCAGACTAACACTTG  
53 TGAAATGTAATGTCTTCAAGAGTGTGATTGTTTTATCTTGAGGTGTCTTTGTTTTACACTAATTTACA  
54 CATAACATATGCACACTTGTATCTAATAGGCATCCTGTACATTGTTAAATATATGATGTACTTGTTT  
55 TTGTGCTGCGGCCGCTGGCCGCAATAAAATATCTTTATTTTCATTACATCTGTGTG

56

57 (b)

58 GGAGAGCTCCAGATGAATGGGTAAGTACATCAAGAGCTTCGTGGAGCGCGTGCTGAAGAACGAGC  
59 AGTAATTCTAGGCGATCGCTCGAGGTTTCATTCCAGAAACATCTCAGATTTATGATGGGATGAGTCAT  
60 ATTAAGGGTAATATGTTCTACATGGTGTTCATAGCAGAGAGAGAAAAAATTGAGTCAAATTTGAAA  
61 ATGACTTCAAAAGTTAAAGAGATCTGTTTGTCCACACTCAGTAATACAGAAAAAAATTACACAGAA  
62 AGCCTTCAAGAGCCTAGTAATGTAGACCTACTCTTCTAATGATTCTCTTAACCGGCTACAGTGGGAA  
63 GTTCTCGAATGCCTTGTGTCTAGCTAGAAACAAGCCCAACAATACTAGCGTTTTGAGCATTAAATCTC  
64 ATGTAGAAAGAGCTAATCCATCTGAATTACACATACATCTGAAAGAAGACTTCAGACTAACACTTG  
65 TGAAATGTAATGTCTTCAAGAGTGTGATTGTTTTATCTTGAGGTGTCTTTGTTTTACACTAATTTACA  
66 CATAACATATGCACACTTGTATCTAATAGGCATCCTGTACATTGTTAAATATATGATGTACTTGTTT

67 TTGTGCTGCGGCCGCTGGCCGCAATAAAATATCTTTATTTTCATTACATCTGTGTGT

68 Figure S2.

69

70

71

72

73

74

75

76 **Supplemental Figure legends**

77 **Figure S1.** LncRNA target sequence fragments as constructed by biosynthesis. (a) *SSC-TCONS\_00010987-WT*;

78 (b) *SSC-TCONS\_00010987-MT*. The black line indicates an insertion sequence, the carrier sequence is on both  
79 sides, and the target sequence is yellow.

80 **Figure S2.** *LEPR* 3'-UTR fragments as constructed by biosynthesis. (a) *SSC-LEPR-WT*; (b) *SSC-LEPR-MT*. The  
81 black line is labeled as an insertion sequence, the carrier sequence is on both sides, and the target sequence is  
82 yellow.

83
